# Supplementary material for: The Influence of Race/Ethnicity on the Transcriptomic Landscape of Uterine Fibroids
Source: MDPI journal article supplement (doi:10.3390/ijms241713441), 2023-08-30
Supplement: s1 [file s1]

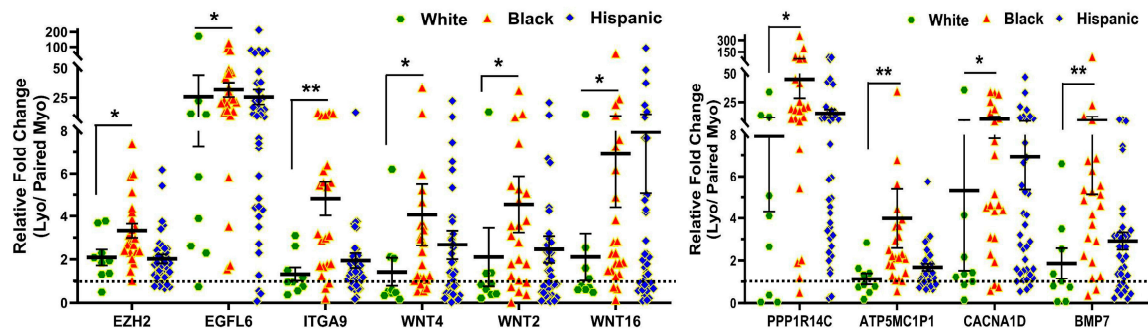

**Supplementary Figure S1:** The mRNA expression of *EZH2*, *EGFL6*, *ITGA9*, *WNT4*, *WNT2*, *WNT16*, *PPP1R14C*, *ATP5MC1P1*, *CACNA1D* and *BMP7* expressed as fold change (Lyo/ paired Myo) in White (n=9), Black (n=23) and Hispanic group (n=37) by qRT-PCR. The results are presented as mean ± SEM with P values (\*P<.05; \*\*P<.01; \*\*\*P<.001) as indicated by the corresponding lines.

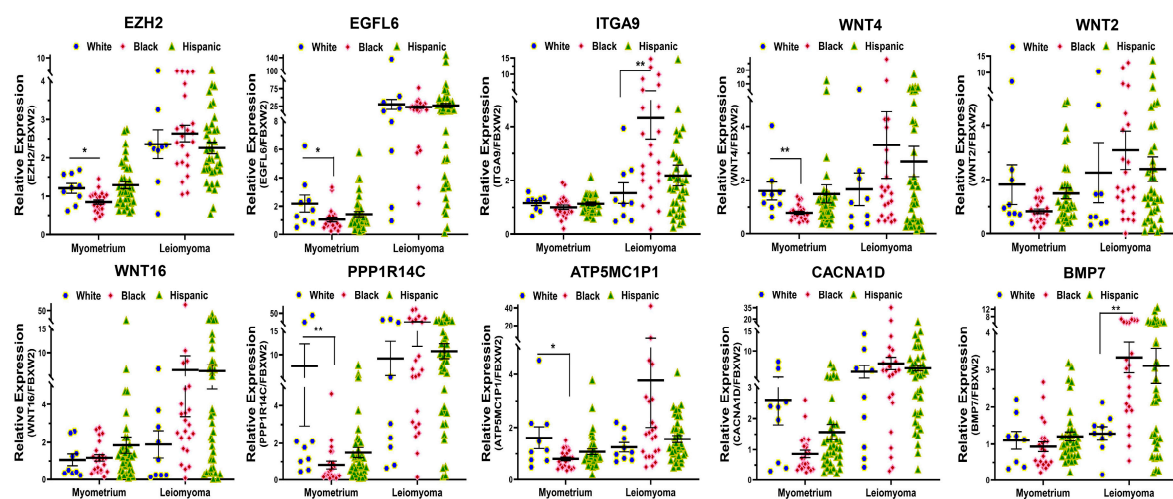

**Supplementary Figure S2:** The mRNA expression of *EZH2*, *EGFL6*, *ITGA9*, *WNT4*, *WNT2*, *WNT16*, *PPP1R14C*, *ATP5MC1P1*, *CACNA1D* and *BMP7* expressed in myometrium and leiomyomas in White (n=9), Black (n=23) and Hispanic group (n=37). The results are presented as mean ± SEM with P values (\*P<.05; \*\*P<.01) as indicated by the corresponding lines.

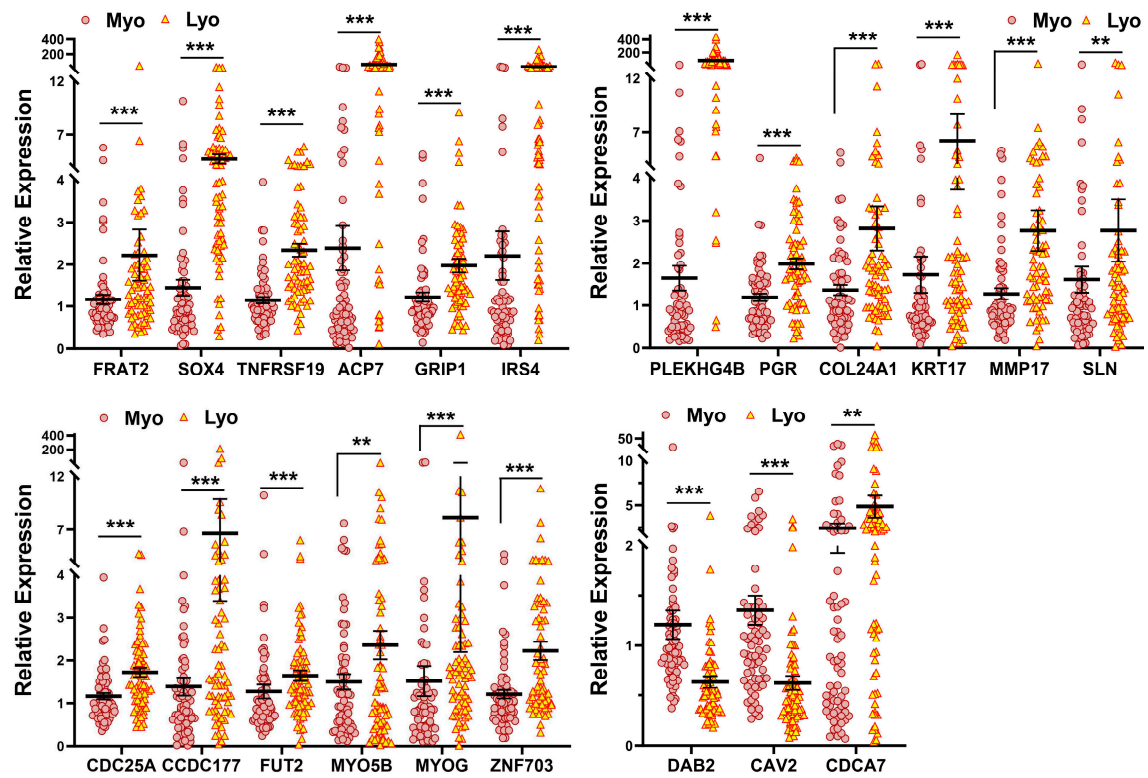

**Supplementary Figure S3:** The expression of select genes (*FRAT2*, *SOX4*, *TNFRSF19*, *ACP7*, *GRIP1*, *IRS4*, *PLEKHG4B*, *PGR*, *COL24A1*, *KRT17*, *MMP17*, *SLN*, *CDC25A*, *CCDC177*, *FUT2*, *MYO5B*, *MYOG*, *ZNF703*, *DAB2*, *CAV2* and *CDCA7*) comparing myometrium with its paired leiomyomas (n=69) by qRT-PCR. The results are presented as mean  $\pm$  SEM with P values (\*\*P<.01; \*\*\*P<.001) indicated by corresponding lines.

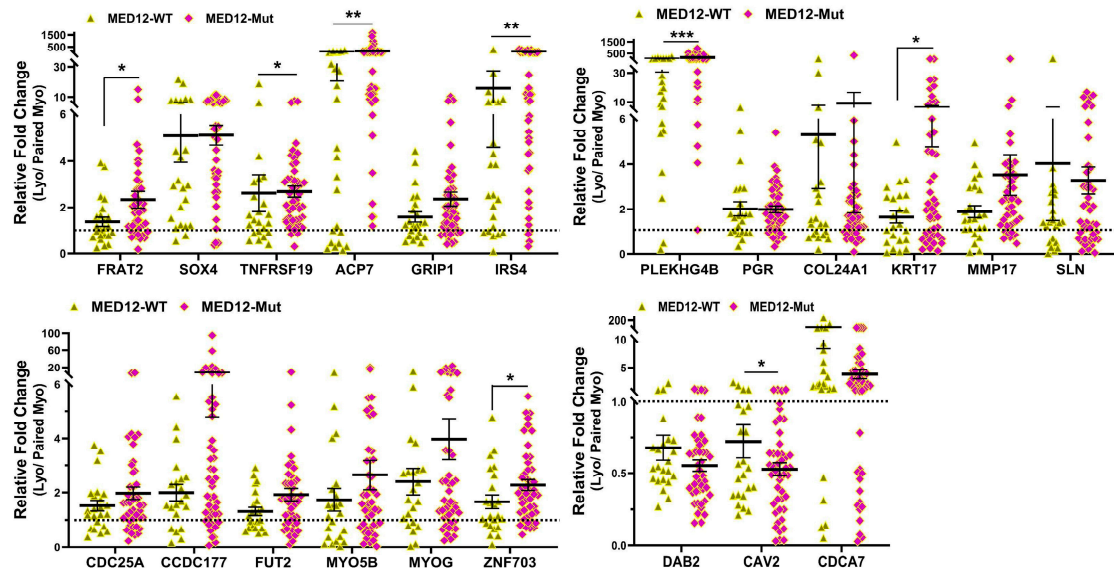

**Supplementary Figure S4:** The expression of mRNA for *FRAT2*, *SOX4*, *TNFRSF19*, *ACP7*, *GRIP1* and *IRS4*, *PLEKHG4B*, *PGR*, *COL24A1*, *KRT17*, *MMP17* and *SLN*, *CDC25A*, *CCDC177*, *FUT2*, *MYO5B*, *MYOG* and *ZNF703*, *DAB2*, *CAV2* and *CDCA7* expressed as fold change (Lyo/ paired Myo) in MED12 mutated (n=46) and non-mutated (n=23) specimens by qRT-PCR. The results are presented as mean  $\pm$  SEM with P values (\*P<.05; \*\*P<.01; \*\*\*P<.001) as indicated by the corresponding lines.
