# Supplementary material for: The Influence of Race/Ethnicity on the Transcriptomic Landscape of Uterine Fibroids
Source: Int J Mol Sci. 2023 Aug 30;24(17):13441. doi: 10.3390/ijms241713441 (PMC10487975; doi:10.3390/ijms241713441)
Supplement: Supplementary file 1 [file ijms-24-13441-s001.zip › Supplementary Table S1-primer sequences.xlsx]

## Sheet: Sheet1
			Primers		Sequences
			FBXW2 (Forward)		5'-CCTCGTCTCTAAACAGTGGAATAA-3'
			FBXW2 (Reverse)		5'-GCGTCCTGAACAGAATCATCTA-3'
			FRAT2 (Forward)		5'-CGAGGATGGCTCAGGGA-3'
			FRAT2 (Reverse)		5'-CGGCTTCCTTGATGAGGTTT-3'
			SOX4 (Forward)		5'-CAGCGACAAGATCCCTTTCA-3'
			SOX4 (Reverse)		5'-GCCGGACTTCACCTTCTTC-3'
			TNFRSF19 (Forward)		5'-CTGCTCATCCTCTGTGTCATC-3'
			TNFRSF19 (Reverse)		5'-TCAGAGCCGTTGTACTGAATG-3'
			ACP7 (Forward)		5'-GGCGGAAGCTCTACATACAC-3'
			ACP7 (Reverse)		5'-ACTGCCACAGCGATAAACA-3'
			GRIP1 (Forward)		5'-GTCGAGCTGATGAAGAAGGAAG-3'
			GRIP1 (Reverse)		5'-CTCCTTGCCGCAGATTAGATAC-3'
			IRS4 (Forward)		5'-AGAGGAGCCACGAAAGAATG -3'
			IRS4 (Reverse)		5'-CGTATGGGTCATCCTCATCTTC-3'
			PLEKHG4B (Forward)		5'-GGATTGCAGAACAACACATCTC-3'
			PLEKHG4B (Reverse)		5'-CTCACGACCTCACACTGAATTA-3'
			PGR (Forward)		5'-GAAGGGCAGCACAACTACTTA-3'
			PGR (Reverse)		5'-CAGCCTGACAGCACTTTCTA-3'
			COL24A1 (Forward)		5'-CCTATCGGTCCATTGGGATTAC-3'
			COL24A1 (Reverse)		5'-CTGGTCCTCTTGATCCTCTTTG-3'
			KRT17 (Forward)		5'-GTGGGTGGTGAGATCAATGT-3'
			KRT17 (Reverse)		5'-CGGTTCTTCTCTGCCATCTT-3'
			MMP17 (Forward)		5'-GTGCGTGCACTCATGTACTA-3'
			MMP17 (Reverse)		5'-CTTGGAGAAGTCGATCTGGATG-3'
			SLN (Forward)		5'-CGGGAGCTGTTTCTCAACTT-3'
			SLN (Reverse)		5'-ACTGATAGGACCTCACAAGGA-3'
			CDC25A (Forward)		5'-GGAAGTACAAAGAGGAGGAAGAG-3'
			CDC25A (Reverse)		5'-GGGAAGATGCCAGGGATAAA-3'
			CCDC177 (Forward)		5'-GTTCTCGAACAGGCAGGAA-3'
			CCDC177 (Reverse)		5'-CACTGTAGGATGACGACGATG-3'
			FUT2 (Forward)		5'-TGTCGGGAGAACATTGACAC-3'
			FUT2 (Reverse)		5'-GTGGTTACACTGTGTGAGTAGAG-3'
			MYO5B (Forward)		5'-CTGCCGGTCTTCCAGAATTTA-3'
			MYO5B (Reverse)		5'-TGTCTCCTCCCTGTGATGTAT-3'
			MYOG (Forward)		5'-GGCGTGTAAGGTGTGTAAGA-3'
			MYOG (Reverse)		5'-GAAGGCCTCATTCACCTTCT-3'
			ZNF703 (Forward)		5'-GCTGGACGCCAAGAAGAG-3'
			ZNF703 (Reverse)		5'-CGCCACCGAGTTGAGTTT-3'
			DAB2 (Forward)		5'-TGTCCATACAGAATGGCGTAAA-3'
			DAB2 (Reverse)		5'-TACTTTGTGGAGGTGGGATAATG-3'
			CAV2 (Forward)		5'-CCTAATGGTTCTGCCTTCAGT-3'
			CAV2 (Reverse)		5'-TCAATCCTGGCTCAGTTGC-3'
			CDCA7 (Forward)		5'-CCGTGGATGGCTACATGAAT-3'
			CDCA7 (Reverse)		5'-TCTCCAACTCCTCCTCTGTAAT-3'
